# Supplementary material
Source: PubMed Central journal article supplement (PMC3888488)
Supplement: NIHMS543003-supplement-supplemental_material.pdf [file NIHMS543003-supplement-supplemental_material.pdf]

## SUPPLEMENTAL MATERIAL

**Supplementary Table S1. Reproducibility Data for Measurements of Cardiac Mechanics (N=95)\***

| Parameter                        | Mean±SD  | Interobserver Reproducibility |                       |       | Intraobserver Reproducibility |                       |       |
|----------------------------------|----------|-------------------------------|-----------------------|-------|-------------------------------|-----------------------|-------|
|                                  |          | ICC<br>(95% CI)               | Mean bias<br>(95% CI) | CV    | ICC<br>(95% CI)               | Mean bias<br>(95% CI) | CV    |
| Global longitudinal strain, %    | 15.3±2.7 | 0.77 (0.69, 0.85)             | 0.71 (0.34-1.08)      | 9.9%  | 0.90 (0.87, 0.94)             | -0.17 (-0.46, 0.11)   | 7.2%  |
| Global circumferential strain, % | 21.6±5.0 | 0.76 (0.67, 0.85)             | 1.22 (0.52, 1.93)     | 13.6% | 0.88 (0.83, 0.93)             | -0.52 (-0.06, 1.09)   | 9.6%  |
| Global radial strain, %          | 27.2±9.7 | 0.92 (0.89, 0.95)             | -0.39 (-1.17, 0.38)   | 11.1% | 0.92 (0.88, 0.95)             | 0.66 (0.10, 1.42)     | 11.3% |
| e' velocity, cm/s                | 2.7±1.1  | 0.76 (0.67, 0.84)             | -0.11 (-0.28, 0.06)   | 26.9% | 0.81 (0.75, 0.88)             | -0.09 (-0.24, 0.06)   | 22.3% |

\*Only unrelated HyperGEN participants were included in reproducibility analyses

SD, standard deviation; ICC = intraclass correlation; CI, confidence interval; CV = coefficient of variation

**Supplementary Table S2. Effect of Stepwise Addition of Covariates on the Association of Albuminuria with Global Longitudinal Strain**

| <b>Covariate added to the statistical model</b> | <b><math>\beta</math>-coefficient per doubling of UACR</b> | <b>95% CI</b> |
|-------------------------------------------------|------------------------------------------------------------|---------------|
| Base model                                      | -0.45                                                      | -0.56, -0.33  |
| +image quality                                  | -0.36                                                      | -0.46, -0.25  |
| +speckle-tracking technician                    | -0.36                                                      | -0.46, -0.25  |
| +institution                                    | -0.28                                                      | -0.38, -0.18  |
| +age                                            | -0.28                                                      | -0.38, -0.18  |
| +sex                                            | -0.29                                                      | -0.39, -0.19  |
| +coronary artery disease                        | -0.29                                                      | -0.39, -0.18  |
| +diabetes mellitus                              | -0.27                                                      | -0.37, -0.17  |
| +history of smoking                             | -0.27                                                      | -0.37, -0.16  |
| +anti-hypertensive use                          | -0.27                                                      | -0.37, -0.16  |
| +systolic blood pressure                        | -0.22                                                      | -0.33, -0.11  |
| +body mass index                                | -0.22                                                      | -0.33, -0.11  |
| +glomerular filtration rate                     | -0.22                                                      | -0.33, -0.11  |
| +ejection fraction                              | -0.22                                                      | -0.33, -0.11  |
| +left ventricular mass index                    | -0.23                                                      | -0.34, -0.12  |

$\beta$ -coefficient of association between urinary albumin-to-creatinine ratio and global longitudinal strain as each covariate is added in a stepwise fashion to the model. The base model is adjusted for the random effects of family membership, as is each model thereafter. Institution is highly collinear with race, and therefore captures the variance attributable to race. UACR = urinary albumin-to-creatinine ratio; CI = confidence interval

**Supplementary Table S3. Effect of Each Individual Covariate on the Association of Albuminuria with Global Longitudinal Strain**

| <b>Covariate added to the base model</b> | <b><math>\beta</math>-coefficient per doubling of UACR</b> | <b>95% CI</b> |
|------------------------------------------|------------------------------------------------------------|---------------|
| Base model                               | -0.45                                                      | -0.56, -0.33  |
| age                                      | -0.45                                                      | -0.57, -0.34  |
| history of smoking                       | -0.45                                                      | -0.56, -0.33  |
| speckle-tracking technician              | -0.45                                                      | -0.56, -0.34  |
| ejection fraction                        | -0.45                                                      | -0.57, -0.34  |
| coronary artery disease                  | -0.44                                                      | -0.56, -0.32  |
| anti-hypertensive medication             | -0.43                                                      | -0.55, -0.31  |
| left ventricular mass index              | -0.43                                                      | -0.54, -0.31  |
| glomerular filtration rate               | -0.43                                                      | -0.55, -0.32  |
| body-mass index                          | -0.41                                                      | -0.53, -0.30  |
| diabetes mellitus                        | -0.40                                                      | -0.52, -0.28  |
| systolic blood pressure                  | -0.37                                                      | -0.49, -0.25  |
| image quality                            | -0.36                                                      | -0.46, -0.25  |
| institution                              | -0.36                                                      | -0.47, -0.25  |

The  $\beta$ -coefficients shown above are for the association between UACR and global longitudinal strain when each individual covariate is added to the base model (which accounts for family relatedness). Thus, each beta-coefficient above is for a model that contains only the covariate, family relatedness, and UACR (in contrast to the stepwise addition of covariates shown above in Supplementary Table S2). UACR = urinary albumin-to-creatinine ratio. CI=confidence interval.

## **HyperGEN Participating Institutions and Principal Staff**

Network Center/University of Utah Field Center: Steven C. Hunt, Roger R. Williams, Hilary Coon, Paul N. Hopkins, Janet Hood, Lily Wu, Jan Skuppin; University of Alabama at Birmingham Field Center: Albert Oberman, Cora E. Lewis, Michael T. Weaver, Phillip Johnson, Susan Walker, Christie Oden; Boston University/Framingham Field Center: R. Curtis Ellison, Richard H. Myers, Yuqing Zhang, Luc Djoussé, Jemma B. Wilk, Greta Lee Splansky; University of Minnesota Field Center: Donna Arnett, Aaron R. Folsom, Mike Miller, Jim Pankow, Gregory Feitl, Barb Lux; University of North Carolina Field Center: Gerardo Heiss, Barry I. Freedman, Kari North, Kathryn Rose, Amy Haire; Data Coordinating Center, Washington University: D.C. Rao, Michael A. Province, Ingrid B. Borecki, Avril Adelman, Derek Morgan, Karen Schwander, David Lehner, Aldi Kraja, Stephen Mandel; Central Biochemistry Laboratory, University of Minnesota: John H. Eckfeldt, Catherine Leiendecker-Foster, Ronald C. McGlennen, Greg Rynders, Michael Y. Tsai, Jean Bucks; Molecular Genetics Laboratory, University of Utah: Mark Leppert, Steven C. Hunt, Jean-Marc Lalouel, Robert Weiss; National Heart, Lung, and Blood Institute: Susan E. Old, Millicent Higgins, Cashell Jaquish, Martha Lundberg, Mariana Gerschenson. Echocardiographic reading center, Weill Cornell Medical College: Richard B. Devereux, Giovanni de Simone, Jonathan N. Bella
